# Supplementary material for: Phytic acid-doped poly-N-phenylglycine potato peels for removal of anionic dyes: investigation of adsorption parameters
Source: Royal Society of Chemistry journal article supplement (doi:10.1039/d1nj04713b), 2022-01-01
Supplement: d1nj04713b1.pdf [file d1nj04713b1.pdf]

## Supplementary Information

### **Phytic acid-doped poly-*N*-phenylglycine potato peels for removal of anionic dyes: Investigation of adsorption parameters**

Kahina Bouhadjra<sup>a,b,c</sup>, Alexandre Barras<sup>c</sup>, Wahiba Lemlikchi<sup>a,d</sup>, Ahmed Addad<sup>c</sup>, Manash R. Das<sup>f,g</sup>, Mohammed A. Amin,<sup>h</sup> Sabine Szunerits<sup>c</sup> and Rabah Boukherroub<sup>c\*</sup>

*<sup>a</sup>Laboratory of Applied Chemistry and Chemical Engineering (LACCE), University of Tizi-Ouzou, Tizi-Ouzou, Algeria*

*<sup>b</sup>High National School of Public Works (HNSPW), El Kouba, Algiers, Algeria*

*<sup>c</sup>Univ. Lille, CNRS, Centrale Lille, Univ. Polytechnique Hauts-de-France, UMR 8520, IEMN, F-59000 Lille, France*

*<sup>d</sup>University of Algiers 1, Algiers, Algeria*

*<sup>e</sup>Univ. Lille, CNRS, UMR 8207 - UMET, F-59000, Lille, France*

*<sup>f</sup>Advanced Materials Group, Materials Sciences and Technology Division, CSIR-North East Institute of Science and Technology, Jorhat, 785006, India*

*<sup>g</sup>Academy of Scientific and Innovative Research, Ghaziabad 201002, India*

*<sup>h</sup>Department of Chemistry, College of Science, Taif University, P.O. Box 11099, Taif 21944, Saudi Arabia*

## Materials and methods

*N*-phenylglycine monomer, *N*-phenyl-*p*-phenylenediamine, phytic acid (50% wt/wt in H<sub>2</sub>O) and ammonium persulfate (APS) were provided from Sigma-Aldrich. Potato peels waste was obtained from a restaurant in Tizi-Ouzou, Algeria. Two commercial anionic dyes (Fig.S1) were used as adsorbates in the experiments. Reactive blue 49 (RB 49) and direct blue 199 (DB 199) dyes, supplied by DBK textile industry, Tizi-Ouzou, (Algeria), are used as-received without further purification. RB 49 is anthraquinone dye with molecular weight of 882.18 g/mol and its molecular formula is C<sub>32</sub>H<sub>23</sub>ClN<sub>7</sub>Na<sub>3</sub>O<sub>11</sub>S<sub>3</sub>. DB 199 is phthalocyanine dye with molecular weight of 775.20 g/mol and its molecular formula is C<sub>32</sub>H<sub>18</sub>CuN<sub>9</sub>NaO<sub>6</sub>S<sub>2</sub> (Fig.S1).

## Characterization

The zeta potential study was performed using a zeta sizer Malvern (ZSP). The thermal degradation characteristics of the adsorbents were studied under nitrogen flow using a thermogravimetric method. Experiments were performed on a Netzsch, TG 209 F3 Tarsus analyzer. Scanning electron microscopy (SEM) images were recorded using a JEOL microscope FEG-SEM JSM 6330F operated at 1 kV. Fourier-transform infrared spectroscopy (FTIR) was carried out to identify the functional groups of the composites using a Nicolet8700 FTIR spectroscopy. Raman spectroscopy measurements were conducted on LabRam-HR Micro-Raman system (Horiba France) using a 473 nm Laser diode as excitation source. Visible light is focused by a 1800 mm focal length monochromator and detected by a CCD camera. X-ray photoelectron spectroscopy (XPS) was performed by XPS SpecsII (Phoibos-Hsa 3500 150, 9 channeltrons) SPECS spectrometer. The specific surface area was determined by the nitrogen gas adsorption study at 77K using a QuantachromeASIQ-win surface area analyzer and Brunauer-Emmett-Teller (BET) calculations. The concentration of RB49 and DB 199 dyes was analyzed by using UV-visible spectrophotometer (Perkin- Elmer Lambda950).

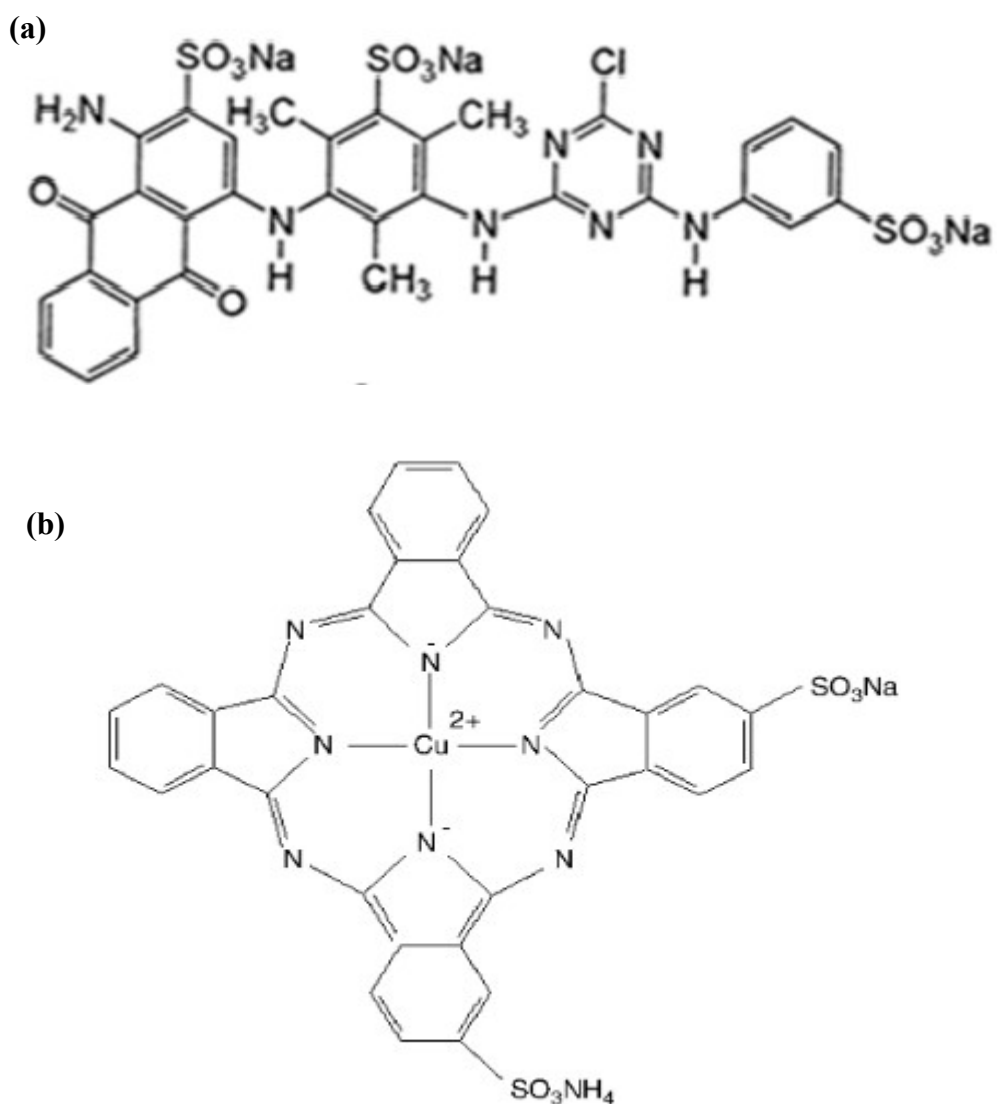

**Figure S1.** Chemical structure of (a) reactive blue 49 and (b) direct blue 199.

| Chemical name        | Commercial name            | Chemical class         | Molecular weight (g/mole) | Chemical formula                 | $\lambda$ (nm) |
|----------------------|----------------------------|------------------------|---------------------------|----------------------------------|----------------|
| (a) Reactive blue 49 | <i>Cibacron Blue P-3R</i>  | Reactive anthraquinone | 882.18                    | $C_{32}H_{23}ClN_7Na_3O_{11}S_3$ | 625            |
| (b) Direct blue 199  | <i>Turquoise Blue BRLE</i> | Direct phthalocyanine  | 775.20                    | $C_{32}H_{18}CuN_9NaO_6S_2$      | 610            |

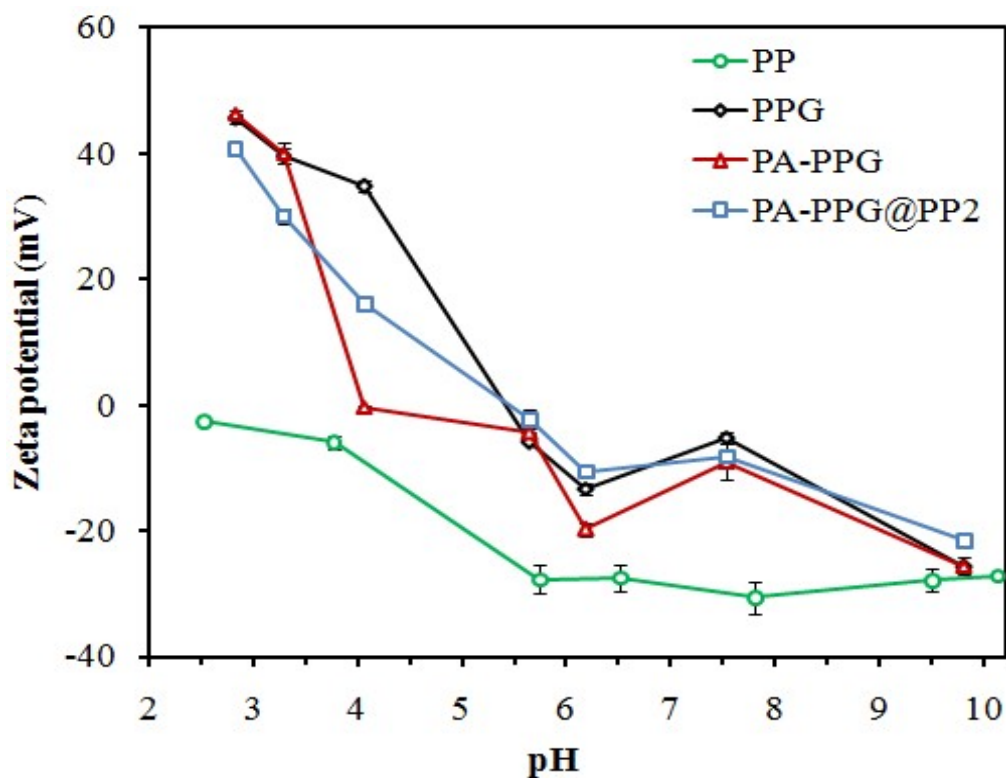

**Figure S2.** Effect of solution pH on zeta potential of PP (green), PPG (black), PA-PPG (red), and PA-PPG@PP2 (blue).

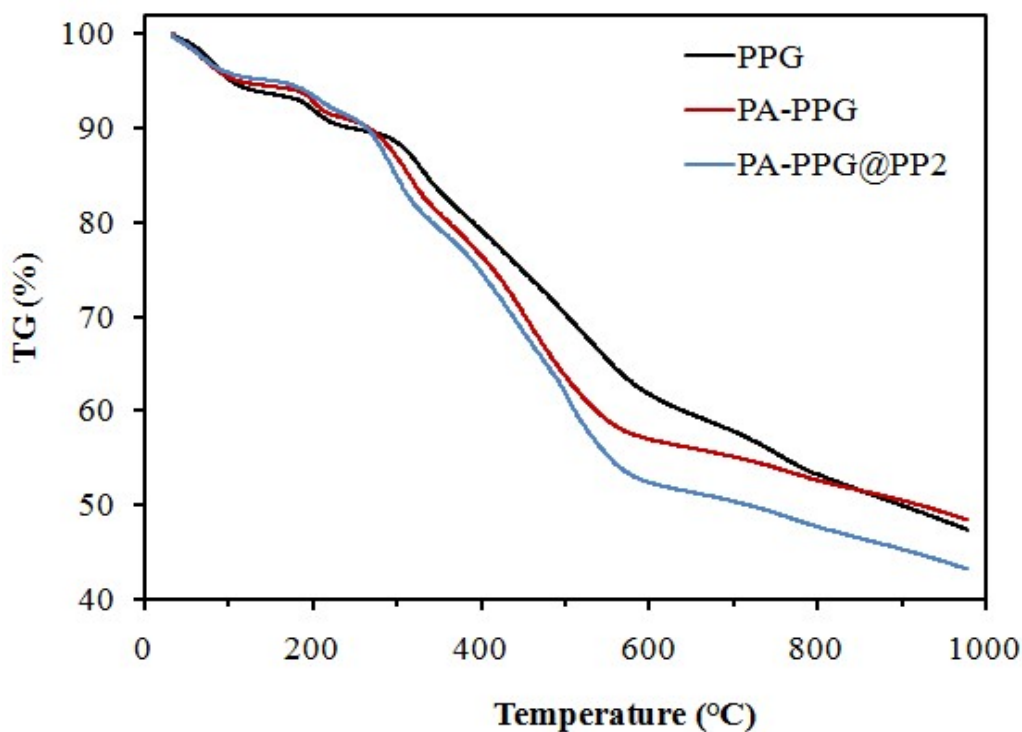

**Figure S3.** Thermogravimetric analysis of PPG (black), PA-PPG (red), and PA-PPG@PP2 (blue).

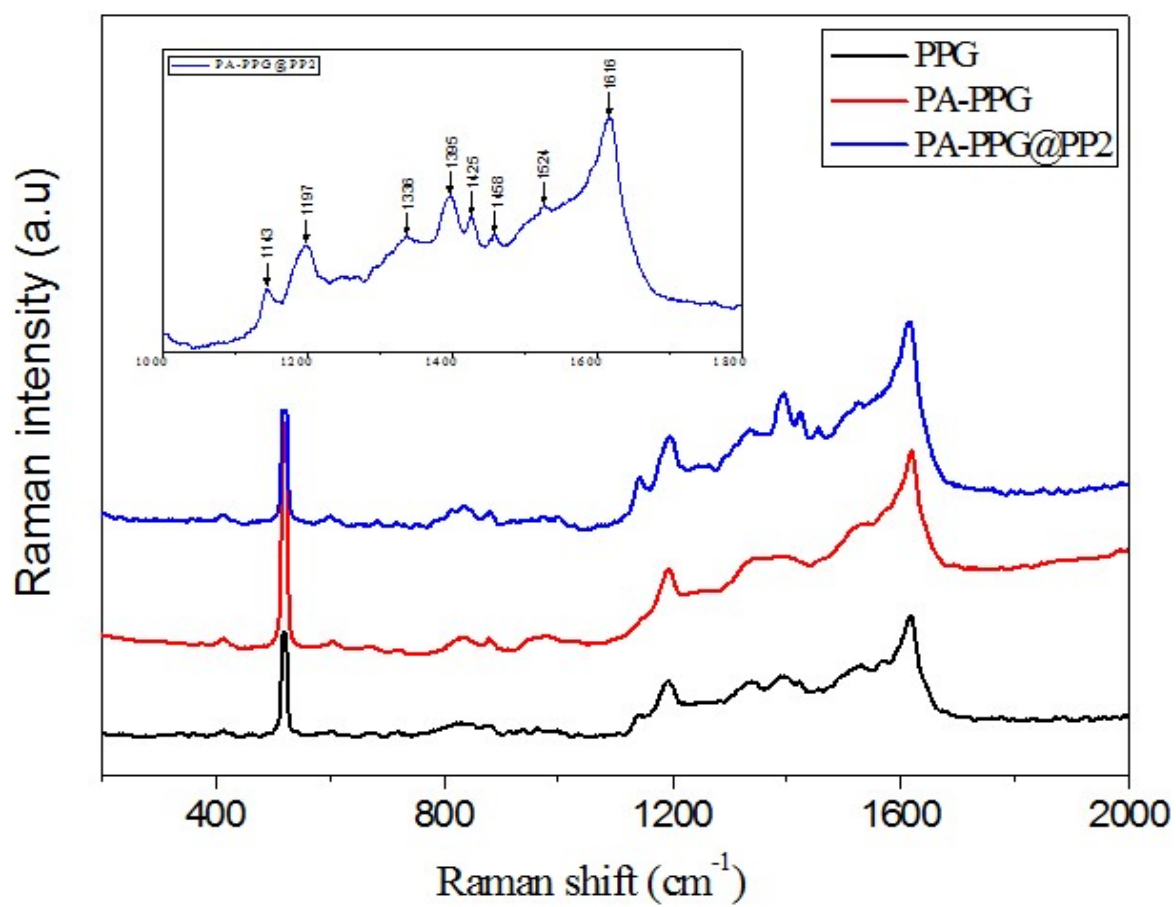

**Figure S4.** Raman spectra of PPG (black), PA-PPG (red) and PA-PPG@PP2 (blue).

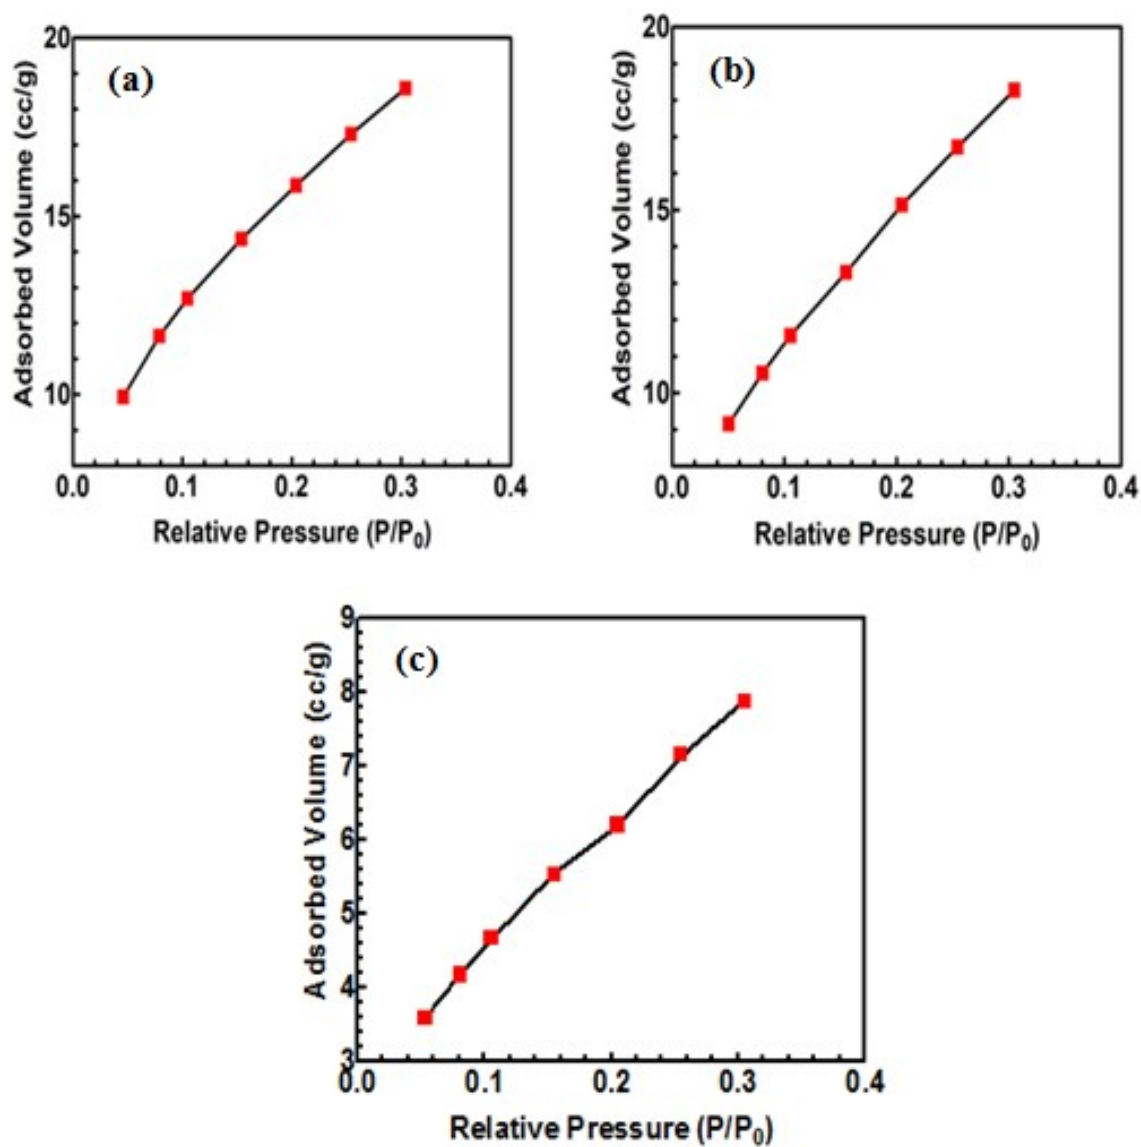

**Figure S5.** BET isotherm plots of (a) PPG, (b) PA-PPG, and (c) PA-PPG@PP2.

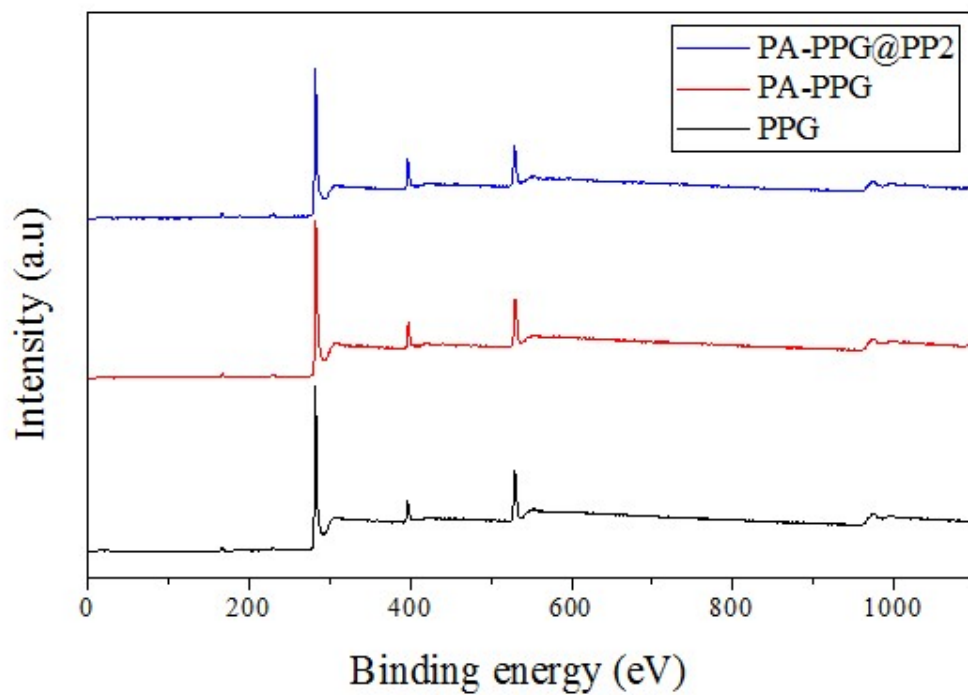

**Figure S6.** X-ray photoelectron spectroscopy (XPS) survey spectra of PPG (black), PA-PPG (red) and PA-PPG@PP2 (blue).

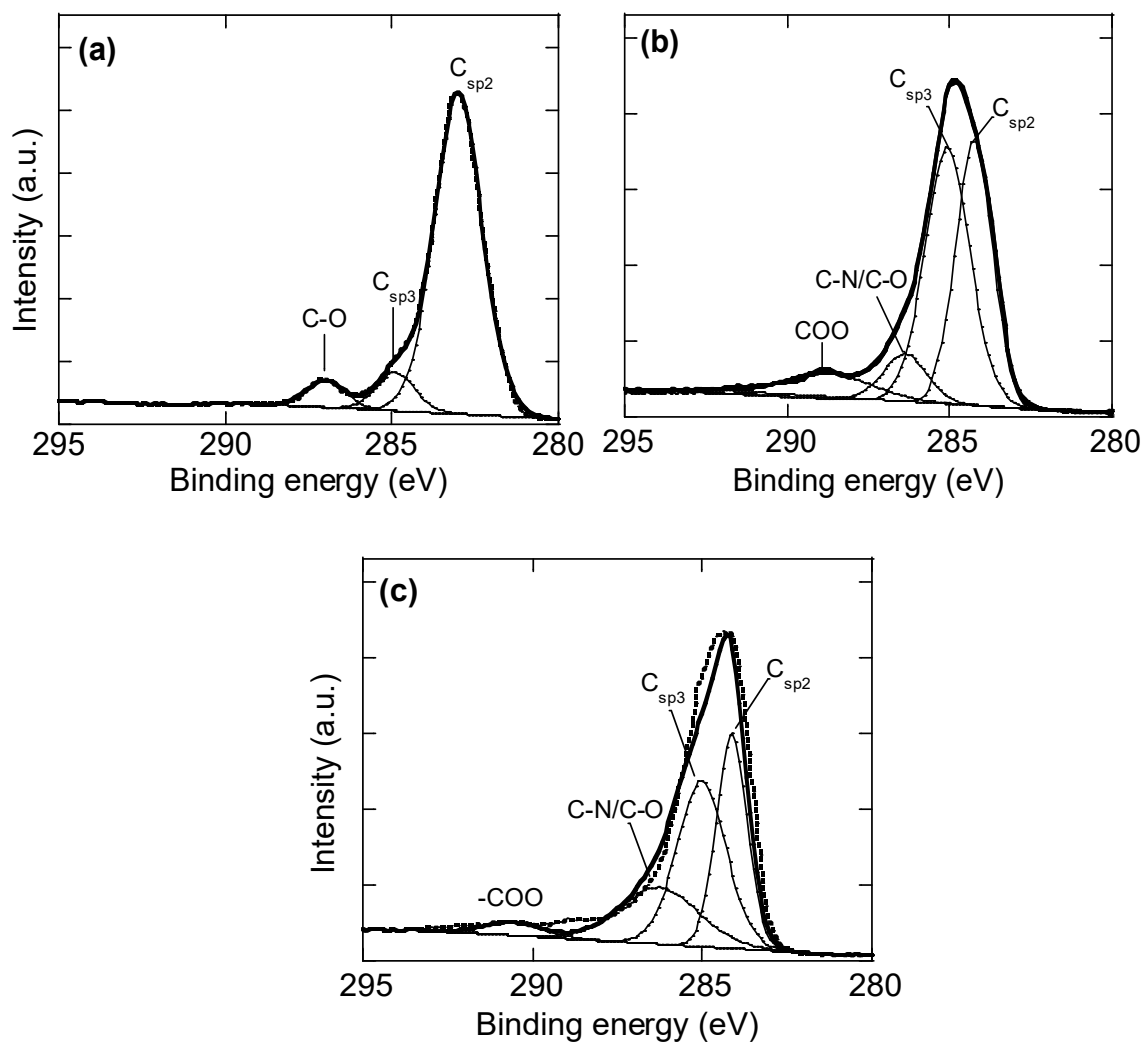

**Figure S7.** High-resolution XPS spectra of the C1s of (a) PPG, (b) PA-PPG, and (c) PA-PPG@PP2.



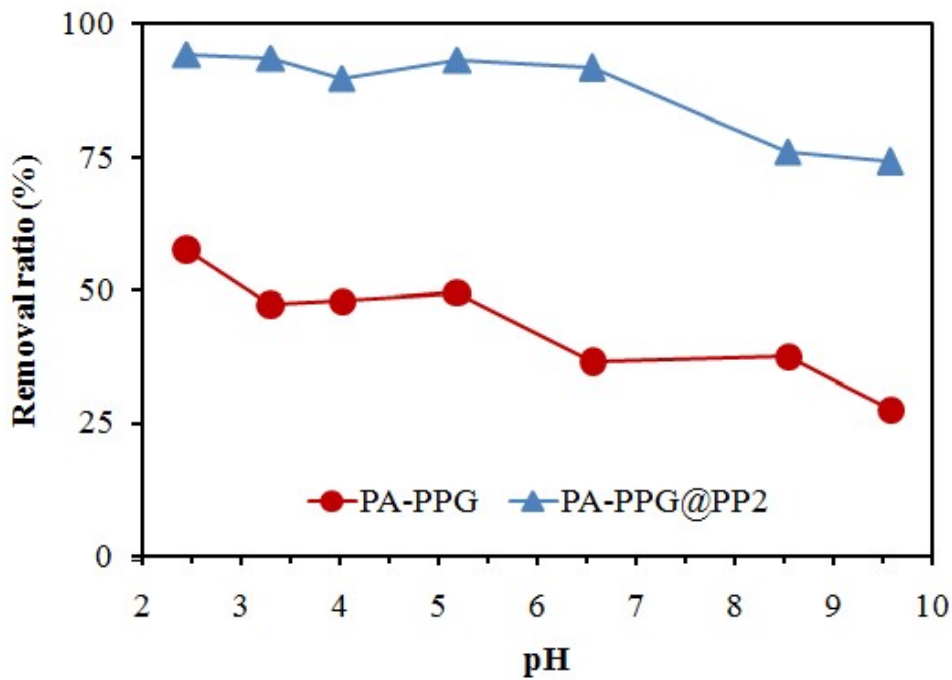

**Figure S8.** Effect of solution pH on adsorption of RB 49 onto PA-PPG (100 mg/L) and PA-PPG@PP2 (100 mg/L), adsorbent dose=0.5 g/L,  $t=2$  h and  $T=25$  °C.

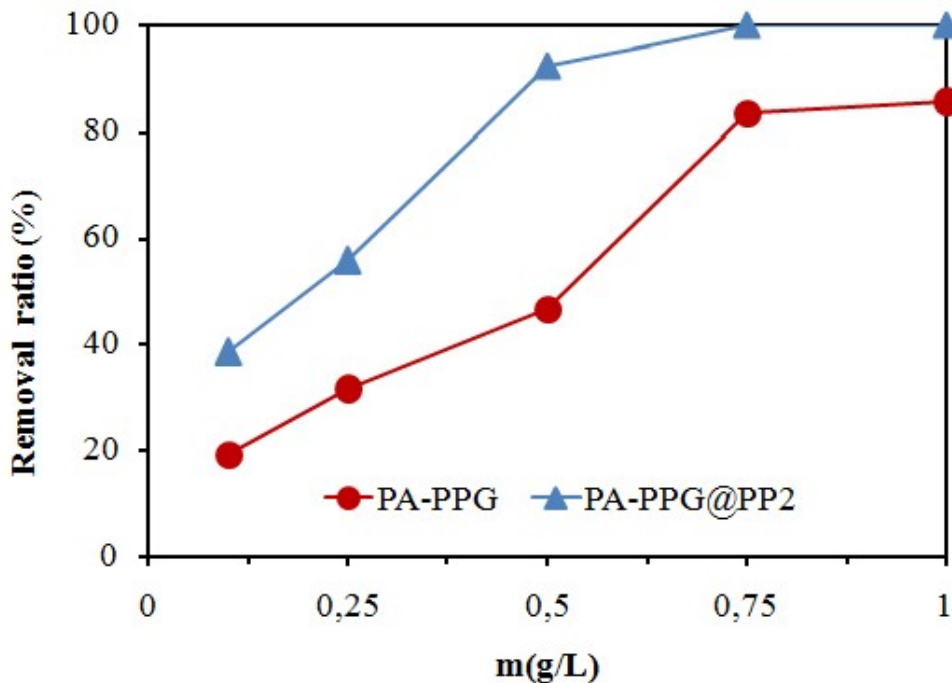

**Figure S9.** RB 49 adsorption ratio as a function of PA-PPG and PA-PPG@PP2 dose (pH=6.5, [RB49]=100 mg/L, adsorption time=24 h and  $T=25$  °C).

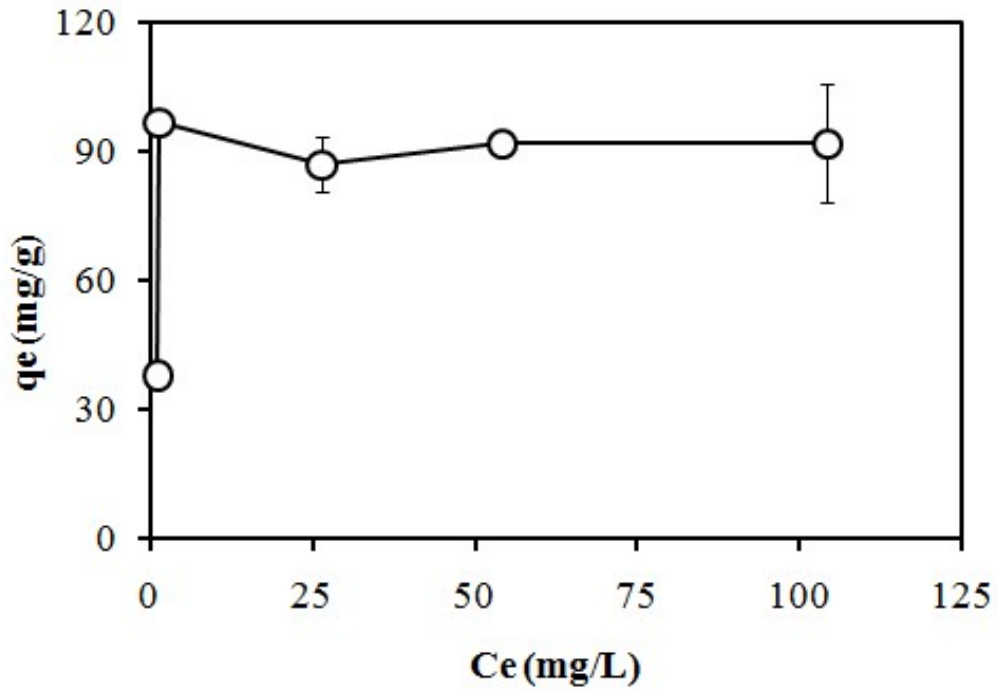

**Figure S10.** Isotherm plot for the adsorption of RB 49 onto PA-PPG (pH = 6.5, adsorbent dose=0.5 g/L, t=24 h and T=25 °C).

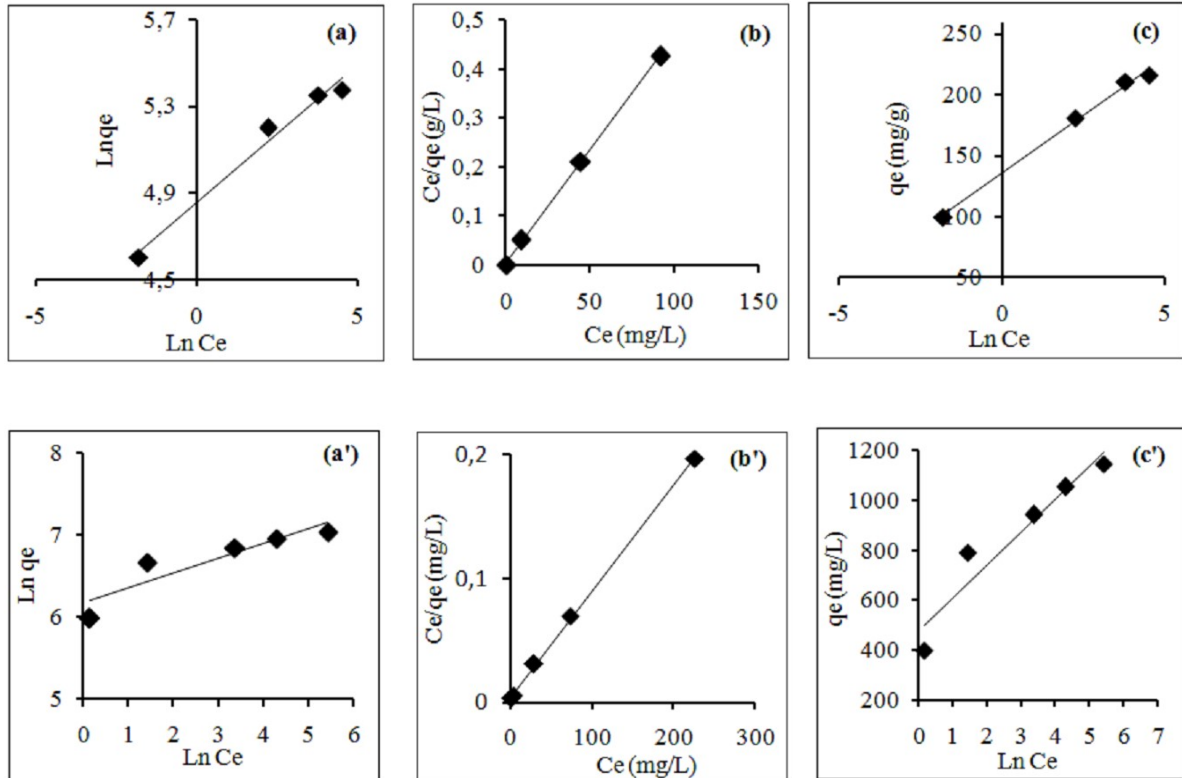

**Figure S11.** Adsorption isotherm curves recorded at 298 K fitted to (a, a') Freundlich, (b, b') Langmuir and (c, c') Temkin models for RB 49 (top) and DB 199 (bottom).

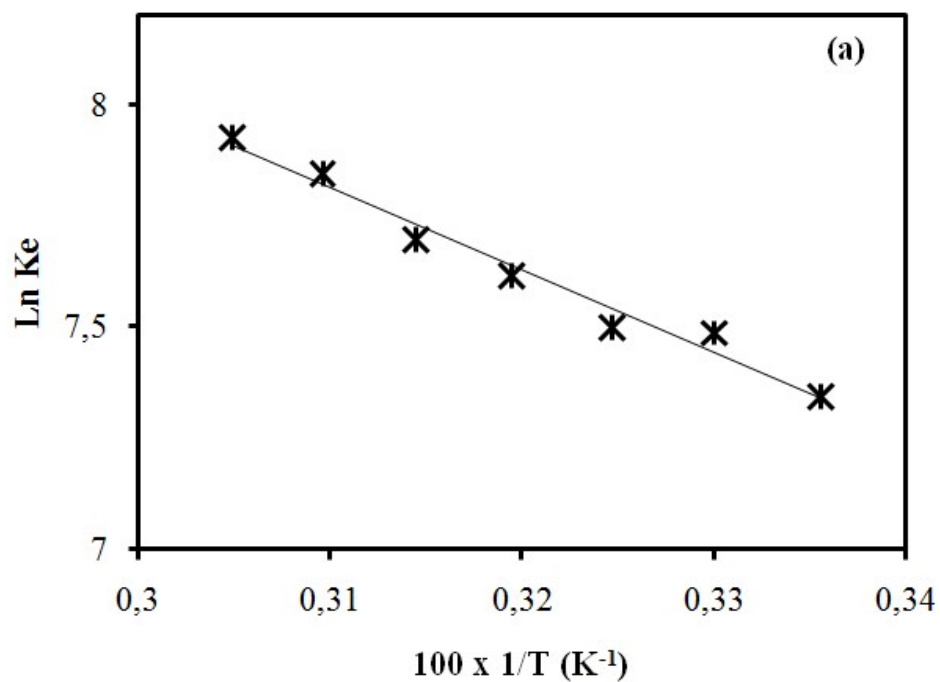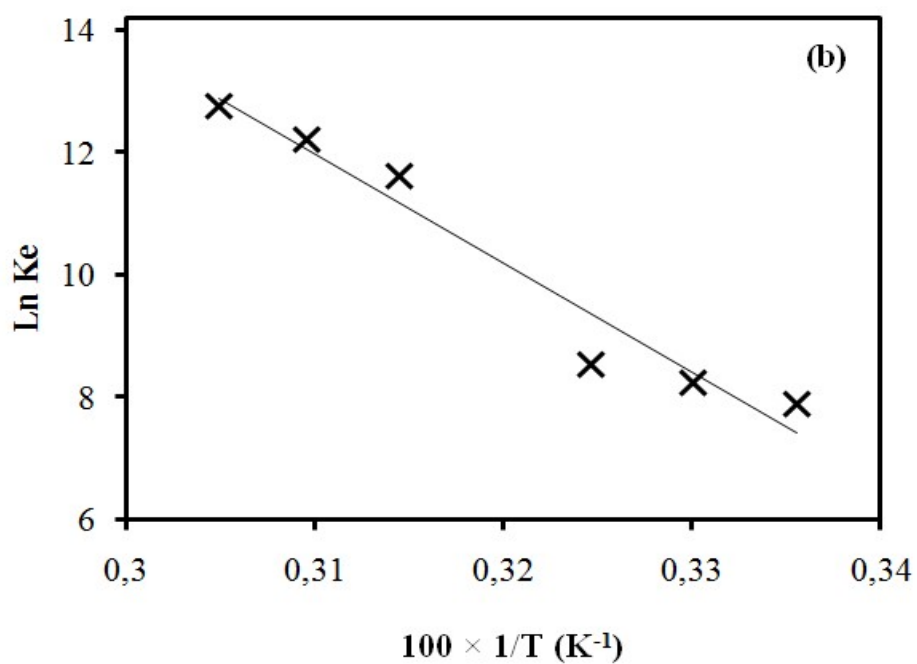

**Figure S12.** Thermodynamic parameters of adsorption of RB 49 (a) and DB 199 (b) onto PA-PPG@PP2 using Van't Hoof equations, (pH=6.5, adsorbent dose=0.5 g/L, t=3 h, [RB49]=200 mg/L and [DB 199]=400 mg/L).

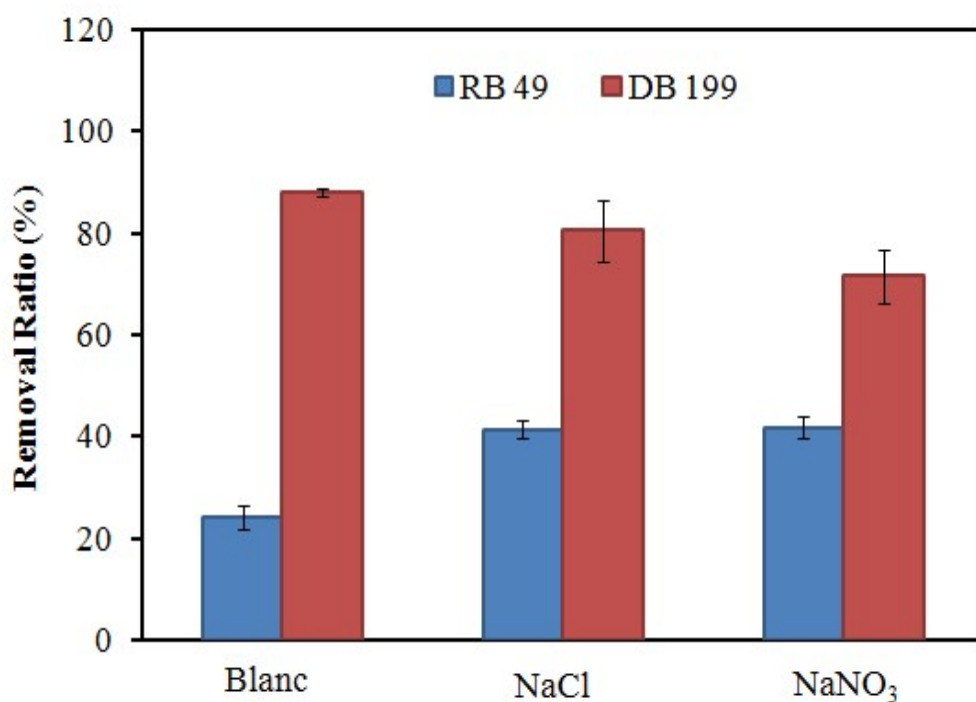

**Figure S13.** Adsorption of RB 49 and DB 199 on PA-PPG@PP2 in presence of anionic species, (pH = 6.5, adsorbent dose = 0.5 g/L, T=25 °C, [RB49] = 200 mg/L, [DB 199] = 400 mg/L, [anionic species] = 0.05M).

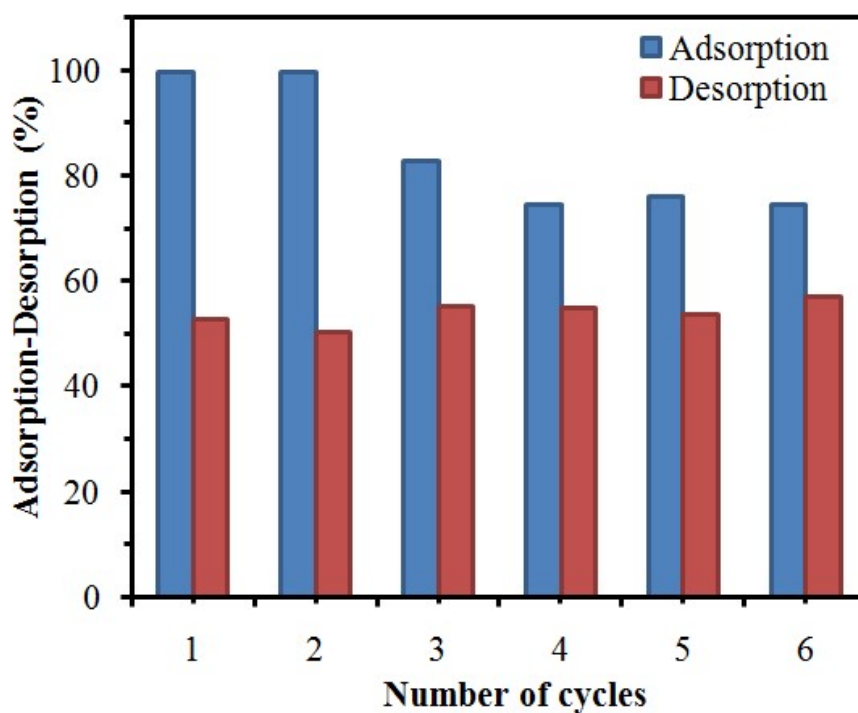

**Figure S14.** Removal efficiency of the PA-PPG@PP2 after six successive cycles of adsorption-desorption DB 199 (adsorbent dose = 0.5 g/L, [DB 199] = 200 mg/L, T=55 °C, t=60 min).

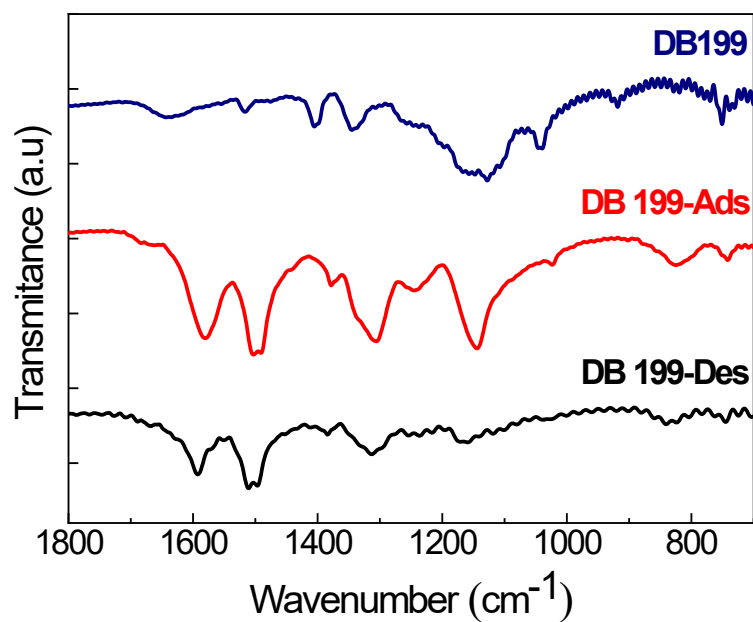

**Figure S15.** FTIR spectra of DB 199 dye and PA-PPG@PP2 after DB 199 dye adsorption/desorption (pH=6.5, adsorbent dose=0.5 g/L, [DB 199]=200 mg/L, T=55 °C, contact time: 60 min).

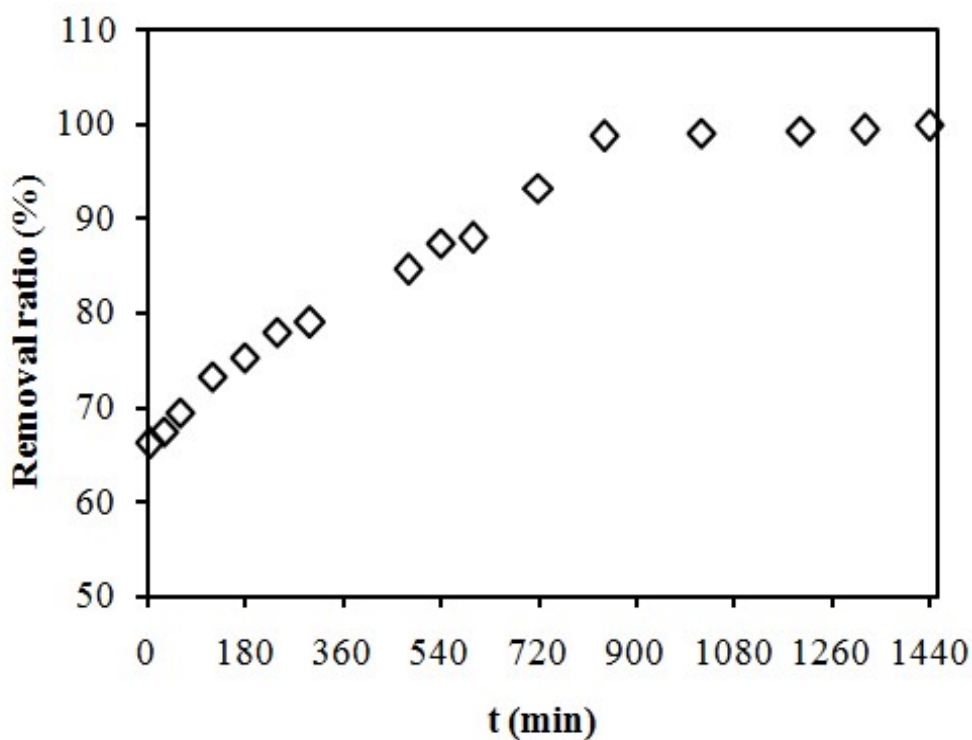

**Figure S16.** Effect of contact time on the adsorption of DB 199 dye onto PA-PPG@PP2 (pH=6.5, adsorbent dose=0.5 g/L, [DB 199]=400 mg/L, T=25 °C).

**Table S1.** Attribution of the main FTIR bands' frequencies.

| Wavenumber (cm <sup>-1</sup> ) |        |            | Attribution                                 |
|--------------------------------|--------|------------|---------------------------------------------|
| PPG                            | PA-PPG | PA-PPG@PP2 |                                             |
| 1692                           | 1688   | -          | bending vibration of carboxyl groups C=O    |
| 1579                           | 1582   | 1586       | quinone ring stretching deformations        |
| 1494                           | 1492   | 1495       | benzene ring stretching deformations        |
| 1313                           | 1314   | 1314       | C-N stretching vibration of benzenoid amine |
| 1253                           | 1254   | 1252       | C=N stretching vibrations                   |
| 1155                           | 1154   | 1154       | C–O–C asymmetrical stretching               |
| 827                            | 829    | 826        | Benzene ring deformation                    |
| 750                            | 749    | 749        | bending vibrations of C–H bonds             |

**Table S2.** Physical characteristics of the adsorbent materials.

| Adsorbent         | Surface area (m <sup>2</sup> /g) | Pore volume (cm <sup>3</sup> /g)<br>×10 <sup>-2</sup> | Pore diameter (Å) |
|-------------------|----------------------------------|-------------------------------------------------------|-------------------|
| <b>PPG</b>        | 59                               | 2.9                                                   | 19                |
| <b>PA-PPG</b>     | 60                               | 2.8                                                   | 19                |
| <b>PA-PPG@PP2</b> | 26                               | 1.2                                                   | 19                |

**Table S3.** Elemental composition of the developed adsorbent materials determined from XPS analysis.

|                  | <b>C<sub>1s</sub></b><br><b>(at.%)</b> | <b>O<sub>1s</sub></b><br><b>(at.%)</b> | <b>N<sub>1s</sub></b><br><b>(at.%)</b> | <b>S<sub>2p</sub></b><br><b>(at.%)</b> | <b>P<sub>2p</sub></b><br><b>(at.%)</b> |
|------------------|----------------------------------------|----------------------------------------|----------------------------------------|----------------------------------------|----------------------------------------|
| <b>PPG</b>       | 83.59                                  | 9.73                                   | 5.92                                   | 0.76                                   | -                                      |
| <b>PA-PPG</b>    | 82.71                                  | 9.69                                   | 6.56                                   | 0.89                                   | 0.15                                   |
| <b>PA-PPG@PP</b> | 81.79                                  | 8.02                                   | 8.79                                   | 1.04                                   | 0.36                                   |

**Table S4.** Kinetic parameters for the adsorption of RB 49 and DB 199 onto PA-PPG@PP2 at different temperatures.

| Adsorbent | T (K) | Pseudo-first-order         |                            |               |       | Pseudo-second-order        |                       |       | Intra-particle diffusion               |          |       |                                        |          |       |
|-----------|-------|----------------------------|----------------------------|---------------|-------|----------------------------|-----------------------|-------|----------------------------------------|----------|-------|----------------------------------------|----------|-------|
|           |       | $q_{e, \text{exp}}$ (mg/g) | $q_{e, \text{cal}}$ (mg/g) | $K_1$ (1/min) | $R^2$ | $q_{e, \text{cal}}$ (mg/g) | $K_2$ g/(mg.min)      | $R^2$ | $K_{id, 1}$ (mg/g.min <sup>0.5</sup> ) | C (mg/g) | $R^2$ | $K_{id, 2}$ (mg/g.min <sup>0.5</sup> ) | C (mg/g) | $R^2$ |
| RB 49     | 298   | 185                        | 24.09                      | 0.02          | 0.847 | 182                        | 0.004                 | 0.999 | 1.549                                  | 161.9    | 0.901 | -                                      | -        | -     |
|           | 303   | 192                        | 21.67                      | 0.01          | 0.965 | 196                        | 0.005                 | 0.999 | 3.452                                  | 166.6    | 0.935 | 1.212                                  | 178.2    | 0.992 |
|           | 318   | 200                        | 15.84                      | 0.02          | 0.920 | 200                        | 0.006                 | 0.999 | 3.680                                  | 173.4    | 0.997 | 0.818                                  | 189.2    | 0.970 |
|           | 328   | 186                        | 10.23                      | 0.01          | 0.440 | 189                        | 0.010                 | 0.999 | 6.233                                  | 154.6    | 0.986 | 0.314                                  | 184.7    | 0.453 |
| DB 199    | 298   | 553                        | 153.83                     | 0.01          | 0.903 | 556                        | $2.4 \times 10^{-4}$  | 0.999 | 6.724                                  | 436.6    | 0.991 | -                                      | -        | -     |
|           | 303   | 603                        | 145.21                     | 0.05          | 0.938 | 625                        | $1.95 \times 10^{-4}$ | 0.999 | 16.35                                  | 404.1    | 0.955 | 5.560                                  | 506.5    | 1.000 |
|           | 318   | 797                        | 165.95                     | 0.05          | 0.700 | 833                        | $1.75 \times 10^{-4}$ | 0.999 | 35.23                                  | 449.7    | 0.963 | 1.171                                  | 777.9    | 0.809 |
|           | 328   | 798                        | 74.13                      | 0.02          | 0.269 | 833                        | $6 \times 10^{-4}$    | 0.999 | 79.56                                  | 284.9    | 0.923 | 0.188                                  | 794.4    | 0.175 |



**Table S5.** Comparison of maximum adsorption capacities of various adsorbents towards RB 49 and DB 199 dyes.

| Adsorbent                                                   | Pollutant | Adsorption capacity, $q_{\max}$ (mg/g) | Reference        |
|-------------------------------------------------------------|-----------|----------------------------------------|------------------|
| <i>Citrus</i> waste biomass (raw)                           | RB 49     | 135.16                                 | 1                |
| <i>Citrus</i> waste biomass (immobilized)                   | RB 49     | 80.00                                  | 1                |
| <i>Citrus</i> waste biomass (Acetic acid treated)           | RB 49     | 232.56                                 | 1                |
| Mixed biosorbent (ABTOC)                                    | RB 49     | 151.05                                 | 2                |
| <i>Capsicum annuum</i> seeds (acetone treated)              | DB 199    | 96.35                                  | 3                |
| Waste Biomass of <i>Aspergillus fumigatus</i>               | DB 199    | 60.6                                   | 4                |
| <i>A. niger</i> powder                                      | DB 199    | 29.96                                  | 5                |
| maize cob, <i>citrus</i> peel and rice husk powders         | DB 199    | 18.58                                  | 6                |
| Cucurbit [6] uril (CB [6])                                  | DB 199    | 240                                    | 7                |
| PAn/ $\gamma$ -Al <sub>2</sub> O <sub>3</sub> nanocomposite | DB 199    | 1000                                   | 8                |
| Ti <sub>0.95</sub> Fe <sub>0.05</sub> O <sub>2</sub>        | RB 49     | 100% (degradation)                     | 9                |
| TiO <sub>2</sub> nanoparticles                              |           | 99.33% (degradation)                   | 10               |
| Phytic acid-doped PPG                                       |           | 92                                     | <b>This work</b> |
| Phytic acid-doped PPG@PP2                                   | RB 49     | 216 (T = 298 K),<br>285 (T = 318 K)    | <b>This work</b> |
| Phytic acid-doped PPG@PP2                                   | DB 199    | 1148 (T=298K)                          | <b>This work</b> |

**Table S6.** Thermodynamic parameters of adsorption of RB 49 and DB 199 onto PA-PPG@PP2.

| Adsorbate | $\Delta G^\circ$ (KJ/mol) |        |        |        |        |        |        | $\Delta H^\circ$ (J/mol) | $\Delta S^\circ$ (J/mol.K) |
|-----------|---------------------------|--------|--------|--------|--------|--------|--------|--------------------------|----------------------------|
|           | 298K                      | 303K   | 308K   | 313K   | 318K   | 323K   | 328K   |                          |                            |
| RB 49     | -18.19                    | -18.85 | -19.20 | -19.82 | -20.56 | -21.06 | -21.60 | +153.92                  | +112.65                    |
| DB 199    | -19.55                    | -20.79 | -21.90 | -22.43 | -30.71 | -32.85 | -34.80 | +1484.88                 | +559.86                    |

## References

1. M. Asgher and H. N. Bhatti, *Can. J. Chem. Eng.*, 2012, **90**, 412-419.
2. S. T. Akar, A. Gorgulu, Z. Kaynak, B. Anilan and T. Akar, *Chem. Eng. J.*, 2009, **148**, 26-34.
3. S. T. Akar, A. Gorgulu, T. Akar and S. Celik, *Chem. Eng. J.*, 2011, **168**, 125-133.
4. B. Wang, K. Zhou, H. Liu and W. Z. Tang, *Environ. Process*, 2016, **3**, 843-856.
5. X. J. Xiong, X. J. Meng and T. L. Zheng, *J. Hazard. Mater.*, 2010, **175**, 241-246.
6. S. Saroj, S. V. Singh and D. Mohan, *Arab. J. Sci. Eng.*, 2015, **40**, 1553-1564.
7. Y. A. Patil, B. Sadhu, D. R. Boraste, A. L. Borkar and G. S. Shankarling, *J. Mol. Struct.*, 2020, **1202**, 127278.
8. H. Javadian, M. T. Angaji and M. Naushad, *J. Ind. Eng. Chem.*, 2014, **20**, 3890-3900.
9. S. Saroj, L. Singh, R. Ranjan and S. V. Singh, *Res. Chem. Intermed.*, 2019, **45**, 1883-1906.
10. L. Singh, S. Saroj, Y. Lee and S. V. Singh, *J. Mater. Sci.*, 2016, **27**, 2581-2588.
